# Supplementary material for: Association of Calf Circumference with Clinical and Biochemical Markers in Older Adults with COVID-19 Admitted at Intensive Care Unit: A Retrospective Cross-Sectional Study
Source: MDPI journal article supplement (doi:10.3390/diseases12050097), 2024-05-08
Supplement: s1 [file s1]

## Supplementary Data

**Table 1.** Profile of elderly patients hospitalized at ICU with COVID-19 according to CC classification.

|                                                     | Total sample     | CC<br>Reduced<br>(n= 120) | CC<br>Normal<br>(n= 88) | p <sup>1</sup> |
|-----------------------------------------------------|------------------|---------------------------|-------------------------|----------------|
| Age (years) <sup>2</sup>                            | 72 (66 - 81)     | 76 (67 - 84)              | 70 (65 - 75)            | <0.001*        |
| Sex (n, %) <sup>2</sup>                             |                  |                           |                         |                |
| Male                                                | 113 (54)         | 76 (63)                   | 37 (63)                 | 0.002*         |
| Female                                              | 95 (46)          | 44 (37)                   | 51 (37)                 |                |
| Hospital Length of Stay (days)                      | 10 (6 - 15)      | 10 (6 - 14)               | 13 (7 - 17)             | 0.019*         |
| Comorbidities (n, %) <sup>2</sup>                   |                  |                           |                         |                |
| Diabetes <sup>2</sup>                               | 69 (33)          | 43 (39)                   | 26 (34)                 | 0.510          |
| Hypertension <sup>2</sup>                           | 124 (59)         | 69 (63)                   | 55 (63)                 | 0.154          |
| Chronic obstructive pulmonary disease <sup>2</sup>  | 30 (14)          | 22 (20)                   | 8 (10)                  | 0.086          |
| Chronic kidney disease <sup>2</sup>                 | 23 (11)          | 15 (13)                   | 8 (10)                  | 0.533          |
| Cardiopathy <sup>2</sup>                            | 39 (18)          | 22 (20)                   | 17 (22)                 | 0.685          |
| Dementia <sup>3</sup>                               | 17 (8)           | 13 (12)                   | 4 (5)                   | 0.129          |
| Hypothyroidism <sup>2</sup>                         | 17 (8)           | 8 (7)                     | 9 (12)                  | 0.283          |
| Cancer <sup>2</sup>                                 | 24 (11)          | 15 (13)                   | 9 (12)                  | 0.727          |
| No comorbidities <sup>2</sup>                       | 19 (9)           | 11 (14)                   | 8 (7)                   | 0.108          |
| Invasive Mechanical Ventilation (n, %) <sup>2</sup> | 90 (43)          | 51 (46)                   | 39 (52)                 | 0.487          |
| Vasoactivedrugs (n, %) <sup>2</sup>                 | 52 (25)          | 30 (27)                   | 22 (30)                 | 0.789          |
| Sedation (n, %) <sup>2</sup>                        | 63 (30)          | 36 (33)                   | 27 (36)                 | 0.676          |
| Hemodialysis (n, %) <sup>2</sup>                    | 18 (9)           | 11 (10)                   | 7 (9.3)                 | 0.865          |
| Edema (n, %) <sup>2</sup>                           | 26 (12)          | 11 (10)                   | 15 (20)                 | 0.058          |
| Weight (kg)                                         | 72 (± 15.9)      | 64.2 (±12.2)              | 82 (±14.3)              | <0.001*        |
| Height (m)                                          | 1.63 (± 0.1)     | 1.62 (± 0.1)              | 1.64 (± 0.1)            | 0.345          |
| Body mass index (kg/m <sup>2</sup> )                | 26.5 (22.5 - 30) | 24.3 (21 - 27.2)          | 30.6 (27 - 34)          | <0.001*        |
| Calf circumference (cm)                             | 29.7 (± 3.8)     | 29 (± 3)                  | 37.2 (± 3)              | <0.001*        |
| Hemoglobin (g/dL)                                   | 12.6 (11 - 13)   | 12.4 (11 - 14)            | 12.2 (11 - 13.7)        | 0.556          |
| Hematocrit (%)                                      | 36.8 (± 7.3)     | 37 (± 7.3)                | 36.4 (± 7.2)            | 0.526          |

|                                 |                  |                   |                    |                   |
|---------------------------------|------------------|-------------------|--------------------|-------------------|
| Urea(mg/dL)                     | 57 (36 - 95)     | 82.3 (40 - 102)   | 63.5 (30 - 80)     | <b>0.025*</b>     |
| Creatinine(mg/dL)               | 1.1 (0.8 - 1.8)  | 2.1 (0.8 - 1.75)  | 1.76 (0.8 - 1.8)   | 0.778             |
| Urea to creatinine ratio        | 44 (33.3 - 58.3) | 52.7 (35 - 64.3)  | 41.8 (30.6 - 48.5) | <b>&lt;0.001*</b> |
| Neutrophil(x10 <sup>9</sup> /L) | 10 (6 - 14)      | 10.2 (7 - 13)     | 10.4 (6 - 14)      | 0.598             |
| Lymphocyte(x10 <sup>9</sup> /L) | 808 (539 - 1149) | 1042 (530 - 1123) | 1045 (553 - 1362)  | 0.480             |
| Neutrophil lymphocyte ratio     | 11.1 (6 - 18)    | 14.8 (5.5 - 15.3) | 14.5 (6.3 - 18)    | 0.767             |
| C reactive protein(mg/dL)       | 12.9 (7 - 20.9)  | 15 (7 - 22)       | 14 (7 - 20.8)      | 0.691             |
| Lactate(mg/L)                   | 18.2 (14.8 - 23) | 20.4 (16 - 21.3)  | 21.7 (13.7 - 25)   | 0.596             |
| SOFA score                      | 6 (2 - 8)        | 5.2 (2 - 8)       | 5.6 (2 - 8)        | 0.279             |
| APACHE II score                 | 15 (11 - 26)     | 18.5 (11 - 25)    | 19.1 (11 - 26)     | 0.609             |
| NUTRIC <sup>1</sup>             | 5 (4 - 6)        | 5 (4 - 6)         | 4.8 (3 - 6)        | 0.544             |
| NRS <sup>1</sup>                | 4 (3 - 5)        | 4.5 (4 - 5)       | 4 (3 - 5)          | <b>&lt;0.001*</b> |
| ≥3 <sup>3</sup>                 | 203 (97)         | 118 (98)          | 85 (96)            |                   |
| <3 <sup>3</sup>                 | 5 (3)            | 2 (1.6)           | 3 (3.4)            | 0.418             |
| SGA <sup>1</sup>                |                  |                   |                    |                   |
| Well-nourished                  | 100 (48)         | 38 (32)           | 62 (74)            | <b>&lt;0.001*</b> |
| Undernourished                  | 103 (49)         | 81 (67)           | 22 (25)            |                   |
| Death (n, %) <sup>2</sup>       | 137 (65)         | 79 (65)           | 58 (65)            | 0.991             |

Variables are described in median and interquartile range or (n) and percentage<sup>1</sup>Mann-whitney test. <sup>2</sup>Chi-square test. <sup>3</sup> Fisher exact test. CC: calf circumference, SOFA: Sequential Organ Failure Assessment, APACHE: Acute Physiology and Chronic Health Evaluation, NUTRIC: Nutrition Risk in Critically Ill, NRS: Nutritional Risk Screening, SGA: Subjective Global Assessment \*Significant p value (<0.05).

**Table 2.** Profile of elderly patients hospitalized at ICU with COVID-19 according to CC classification stratified by sex.

|                                                    | Men                   |                      |                | Women                 |                      |                |
|----------------------------------------------------|-----------------------|----------------------|----------------|-----------------------|----------------------|----------------|
|                                                    | CC reduced<br>(n= 76) | CC normal<br>(n= 37) | p <sup>1</sup> | CC reduced<br>(n= 44) | CC normal<br>(n= 51) | p <sup>1</sup> |
| Age (years)                                        | 75.5 (69 - 84)        | 69 (64- 75)          | <b>0.007*</b>  | 75 (67 - 84)          | 67 (64 - 73)         | <b>0.002*</b>  |
| Hospital Length of Stay (days)                     | 8 (6 - 13)            | 13 (7 - 19)          | <b>0.003*</b>  | 10 (5 - 15)           | 12 (7 - 17)          | 0.334          |
| Comorbidities (n, %) <sup>2</sup>                  |                       |                      |                |                       |                      |                |
| Diabetes <sup>2</sup>                              | 26 (37)               | 9 (26)               | 0.259          | 17 (42)               | 17 (41)              | 0.925          |
| Hypertension <sup>2</sup>                          | 45 (65)               | 23 (67)              | 0.807          | 24 (60)               | 32 (78)              | 0.079          |
| Chronic obstructive pulmonary disease <sup>3</sup> | 15 (21)               | 3 (8.8)              | 0.105          | 7 (17)                | 5 (12)               | 0.502          |

|                                                     |                    |                    |                   |                   |                    |                   |
|-----------------------------------------------------|--------------------|--------------------|-------------------|-------------------|--------------------|-------------------|
| Chronic kidney disease <sup>3</sup>                 | 13 (17)            | 4 (11)             | 0.458             | 3 (7.5)           | 4 (9.7)            | 0.718             |
| Cardiopathy <sup>2</sup>                            | 11 (16)            | 3 (23)             | 0.351             | 11 (27)           | 9 (22)             | 0.563             |
| Dementia <sup>3</sup>                               | 9 (13)             | 3 (8.8)            | 0.530             | 4 (10)            | 1 (2)              | 0.157             |
| Hypothyroidism <sup>3</sup>                         | 2 (2.9)            | 2 (5.8)            | 0.461             | 6 (15)            | 7 (17)             | 0.799             |
| Cancer <sup>3</sup>                                 | 9 (13)             | 4 (11)             | 0.854             | 6 (15)            | 5 (12)             | 0.713             |
| No comorbidities <sup>3</sup>                       | 4 (5.8)            | 6 (17.6)           | 0.056             | 4 (10)            | 5 (12)             | 0.753             |
| Invasive Mechanical Ventilation (n, %) <sup>2</sup> | 33 (47)            | 18 (53)            | 0.625             | 18 (45)           | 21 (51)            | 0.575             |
| Vasoactive drugs (n, %) <sup>2</sup>                | 21 (30)            | 10 (29)            | 0.731             | 9 (22)            | 12 (29)            | 0.487             |
| Sedation (n, %) <sup>2</sup>                        | 24 (34)            | 13 (38)            | 0.915             | 12 (30)           | 14 (34)            | 0.689             |
| Hemodialysis (n, %) <sup>3</sup>                    | 2 (5.8)            | 8 (11.5)           | 0.357             | 3 (7.5)           | 5 (12)             | 0.479             |
| Edema (n, %) <sup>3</sup>                           | 5 (7.25)           | 5 (14.7)           | 0.229             | 6 (15)            | 10 (24)            | 0.289             |
| Weight (kg)                                         | 65 (±11)           | 85 (±14.2)         | <b>&lt;0.001*</b> | 62.6 (± 12.6)     | 82 (± 14)          | <b>&lt;0.001*</b> |
| Height (m)                                          | 1.66 (± 0.1)       | 1.73 (± 0.1)       | <b>&lt;0.001*</b> | 1.56 (± 0.1)      | 1.58 (± 0.1)       | <b>0.010*</b>     |
| Body mass index (kg/m <sup>2</sup> )                | 23 (20 - 25)       | 28.3 (25 - 30.8)   | <b>&lt;0.001*</b> | 26 (22.3 - 28.3)  | 32.4 (28 - 36)     | <b>&lt;0.001*</b> |
| Calf circumference (cm)                             | 29.6 (± 3.0)       | 37.69 (± 3.2)      | <b>&lt;0.001*</b> | 29 (± 3)          | 37 (± 3)           | <b>&lt;0.001*</b> |
| Hemoglobin (g/dL)                                   | 12.9 (11.1 - 14)   | 13.4 (10.8 - 15)   | 0.931             | 12.6 (11 - 14)    | 12.1(11 - 13.2)    | 0.632             |
| Hematocrit (%)                                      | 37.4 (± 7.3)       | 36.5 (± 9)         | 0.652             | 37 (± 7.3)        | 36 (± 5.9)         | 0.802             |
| Urea (mg/dL)                                        | 69 (44 - 113)      | 60 (38 - 110)      | 0.188             | 50 (29 - 73)      | 40 (27 - 70)       | 0.540             |
| Creatinine (mg/dL)                                  | 1.3 (0.9 - 2.3)    | 1.5 (1 - 2.3)      | 0.199             | 1 (0.7 - 1.5)     | 1 (0.8 - 1.6)      | 0.770             |
| Urea to creatinine ratio                            | 50.4 (37.4 - 64.3) | 40 (33 - 53)       | <b>&lt;0.001*</b> | 44.2 (32 - 64)    | 38 (30 - 48)       | 0.401             |
| Neutrophil(x10 <sup>9</sup> /L)                     | 10.0 (8 - 13)      | 10 (8 - 14)        | 0.584             | 8 (5 - 14)        | 10 (5 - 15)        | 0.513             |
| Lymphocyte(x10 <sup>9</sup> /L)                     | 671 (480 - 1084)   | 808 (540 - 1265)   | 0.164             | 886 (650 - 1218)  | 782 (526 - 1352)   | 0.384             |
| Neutrophil lymphocyte ratio                         | 12.7 (7.28 - 18.4) | 11.2 (7.25 - 18.6) | 0.832             | 6.6 (4.5 - 14)    | 8.6 (5 - 15)       | 0.065             |
| C reactive protein (mg/dL)                          | 12.8 (7.3 - 21.6)  | 12 (7.4 - 22)      | 0.631             | 11.1 (6.3 - 22.2) | 14.7 (6.4 - 20.8)  | 0.899             |
| Lactate(mmol/L)                                     | 19.4 (16.8 - 24.6) | 18.6 (13.8 - 25)   | 0.318             | 16.5 (13 - 18.4)  | 17.4 (12.6 - 25.2) | 0.405             |
| SOFA score                                          | 6.0 (4 - 8.0)      | 6 (3 - 8)          | 0.420             | 3.5 (2 - 7)       | 6 (2 - 8)          | 0.192             |
| APACHE II score                                     | 18 (12 - 29)       | 22 (12 - 29)       | 0.533             | 13.0 (10 - 21)    | 15 (10 - 25)       | 0.248             |
| NUTRIC <sup>2</sup>                                 | 5 (4 - 6)          | 5 (4 - 6)          | 0.865             | 4 (3 - 6)         | 4 (3 - 6)          | 0.768             |
| NRS <sup>2</sup>                                    | 4 (4 - 6)          | 4 (3 - 5)          | 0.094             | 4 (3 - 5)         | 3.6 (3 - 4)        | <b>0.007*</b>     |
| ≥3 <sup>3</sup>                                     | 74 (97)            | 37 (100)           | 0.319             | 44 (100)          | 48 (94)            | 0.102             |
| <3 <sup>3</sup>                                     | 2 (2.6)            | 0                  |                   | 0                 | 3 (5)              |                   |
| SGA <sup>2</sup>                                    |                    |                    |                   |                   |                    |                   |
| Well-nourished                                      | 23 (30)            | 24 (66)            |                   | 15 (34)           | 38 (79)            |                   |

|                           |         |         |         |         |         |         |
|---------------------------|---------|---------|---------|---------|---------|---------|
| Undernourished            | 52 (69) | 12 (33) | <0.001* | 29 (65) | 10 (20) | <0.001* |
| Death (n, %) <sup>2</sup> | 52 (68) | 23 (62) | 0.509   | 27 (61) | 35 (68) | 0.458   |

Variables are described in median and interquartile range or (n) and percentage and mean  $\pm$  standard deviation from the mean.<sup>1</sup>Obtained by the analysis of t Student unpaired test or Mann-whitney test. <sup>2</sup>Chi-square <sup>3</sup> Fisher exact test. APACHE: Acute Physiology and Chronic Health Evaluation, NUTRIC: Nutrition Risk in Critically Ill, NRS: Nutritional Risk Screening, SGA: Subjective Global Assessment. \*Significant p value (<0.05).

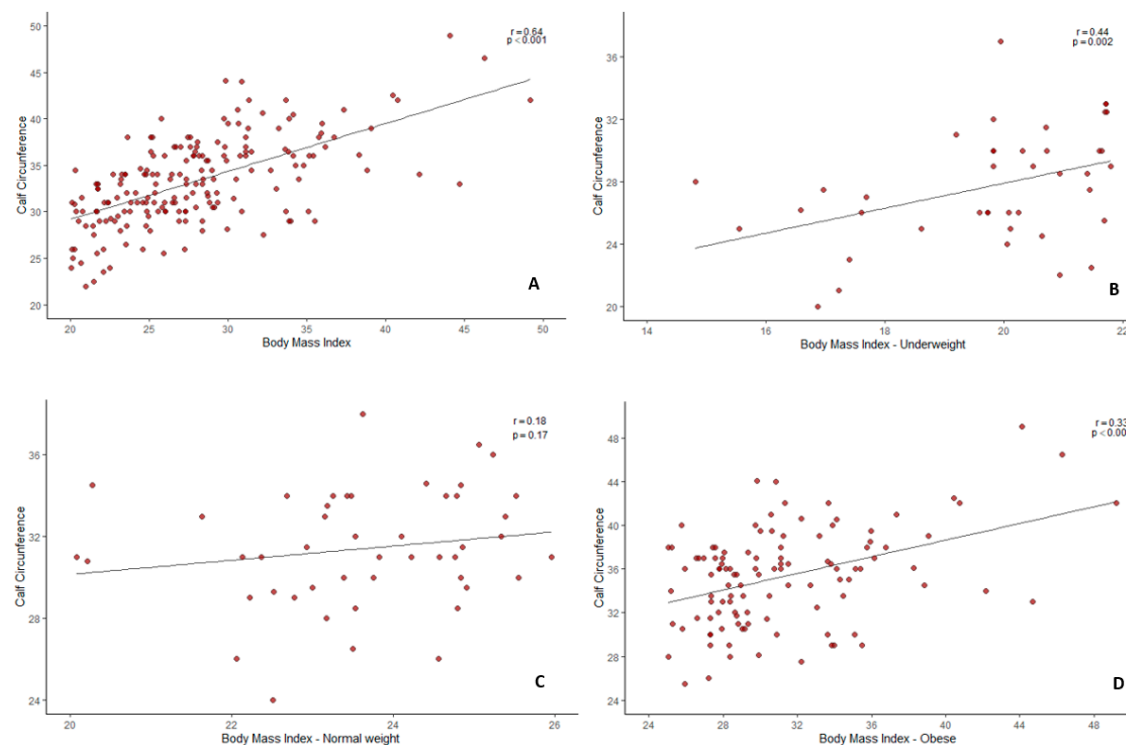

**Figure 1.** **A:** Pearson correlation graph between BMI and CC of patients admitted to the ICU with covid-19. **B:** Pearson correlation chart between underweight BMI and CC of patients admitted to the ICU with covid-19. **C:** Pearson correlation chart between normal BMI and CC of patients admitted to the ICU with covid-19. **D:** Pearson correlation chart between BMI overweight/obesity and CC of patients admitted to the ICU with covid-19.

**Table 3.** Association between CC and biochemical and clinical characteristics in elderly patients admitted at ICU with COVID-19.

| Variables                                               | Model 1            |                   | Model 2           |               |
|---------------------------------------------------------|--------------------|-------------------|-------------------|---------------|
|                                                         | OR (95% CI)        | p                 | OR (95% CI)       | P             |
| Hemoglobin (g/dL)                                       | 1.02 (0.91; 1.15)  | 0.632             | 0.99 (0.87; 1.12) | 0.881         |
| Hematocrit (%)                                          | 1.01 (0.97; 1.05)  | 0.547             | 1.00 (0.96; 1.05) | 0.781         |
| Urea (mg/dL)                                            | 1.00 (1.00; 1.01)  | <b>0.017</b>      | 1.00 (1.00; 1.01) | <b>0.043</b>  |
| Creatinine (mg/dL)                                      | 1.03 (0.93; 1.15)  | 0.486             | 1.05 (0.87; 1.28) | 0.555         |
| Urea to creatinine ratio                                | 1.02 (1.00; 1.04)  | <b>0.002</b>      | 1.01 (0.99; 1.03) | 0.188         |
| Neutrophil( $\times 10^9/L$ )                           | 0.99 (0.93; 1.05)  | 0.781             | 1.00 (0.89; 1.13) | 0.896         |
| Lymphocyte( $\times 10^9/L$ )                           | 0.99 (0.99; 1.00)  | 0.985             | 0.99 (0.99; 1.00) | 0.260         |
| Neutrophil lymphocyte ratio                             | 1.00 (0.98; 1.01)  | 0.843             | 1.00 (0.98; 1.02) | 0.559         |
| C reactive protein(mg/dL)                               | 1.00 (0.98; 1.03)  | 0.542             | 1.03 (0.99; 1.07) | 0.105         |
| Lactate(mmol/L)                                         | 0.99 (0.97; 1.01)  | 0.473             | 0.99 (0.96; 1.01) | 0.559         |
| Diabetes                                                | 1.22 (0.66; 2.26)  | 0.510             | 1.58 (0.75; 3.34) | 0.224         |
| Hypertension                                            | 0.62 (0.62; 1.19)  | 0.155             | 0.60 (0.27; 1.33) | 0.212         |
| Chronic obstructive pulmonary disease                   | 2.11 (0.88; 5.05)  | 0.091             | 1.40 (0.49; 3.99) | 0.528         |
| Chronic kidney disease                                  | 1.33 (0.53; 3.33)  | 0.534             | 1.70 (0.56; 5.20) | 0.346         |
| Cardiopathy                                             | 0.86 (0.42; 1.76)  | 0.686             | 0.76 (0.30; 1.90) | 0.561         |
| Dementia                                                | 2.40 (0.75; 7.68)  | 0.139             | 0.89 (0.22; 3.54) | 0.874         |
| Hypothyroidism                                          | 0.58 (0.21; 1.58)  | 0.288             | 0.65 (0.16; 2.50) | 0.534         |
| Cancer                                                  | 1.17 (0.48; 2.83)  | 0.728             | 0.93 (0.34; 2.51) | 0.887         |
| No comorbidities                                        | 2.16 (0.82; 5.68)  | 0.115             | 1.93 (0.64; 5.77) | 0.237         |
| Invasive Mechanical Ventilation                         | 0.81 (0.45; 1.46)  | 0.487             | 1.00 (0.47; 2.12) | 0.992         |
| Vasoactive drugs                                        | 0.91 (0.47; 1.75)  | 0.789             | 1.16 (0.49; 2.75) | 0.727         |
| Sedation                                                | 0.87 (0.47; 1.62)  | 0.676             | 1.02 (0.45; 2.30) | 0.945         |
| Hemodialysis                                            | 1.09 (0.40; 2.95)  | 0.865             | 1.75 (0.51; 5.99) | 0.371         |
| Edema (n, %) <sup>2</sup>                               | 0.44 (0.19; 1.04)  | 0.062             | 1.22 (0.41; 3.61) | 0.717         |
| SOFA score                                              | 0.96 (0.89; 1.05)  | 0.440             | 0.96 (0.83; 1.11) | 0.600         |
| NUTRIC                                                  | 1.05 (0.89; 1.24)  | 0.501             | 1.44 (0.97; 2.13) | 0.065         |
| NRS (continuous)                                        | 1.46 (1.15; 1.86)  | <b>0.002*</b>     | 1.02 (0.77; 1.35) | 0.869         |
| <b>NRS (<math>\geq 3</math> vs <math>&lt; 3</math>)</b> | 0.48 (0.07; 2.93)  | 0.427             | 0.36 (0.02; 4.88) | 0.446         |
| SGA (well-nourished vs undernourished)                  | 6.00 (2.22; 11.17) | <b>&lt;0.001*</b> | 2.56 (1.24; 5.27) | <b>0.011*</b> |

|                                |                   |       |                   |       |
|--------------------------------|-------------------|-------|-------------------|-------|
| Hospital Length of Stay (days) | 0.96 (0.92; 0.92) | 0.999 | 0.97 (0.93; 1.01) | 0.158 |
|--------------------------------|-------------------|-------|-------------------|-------|

Model 1: Crude model; Model 2: adjusted model by sex, age and APACHE II. APACHE: Acute Physiology and Chronic Health Evaluation, NUTRIC: Nutrition Risk in Critically III, NRS: Nutritional Risk Screening, SGA: Subjective Global Assessment. \*Significant p value (<0.05).

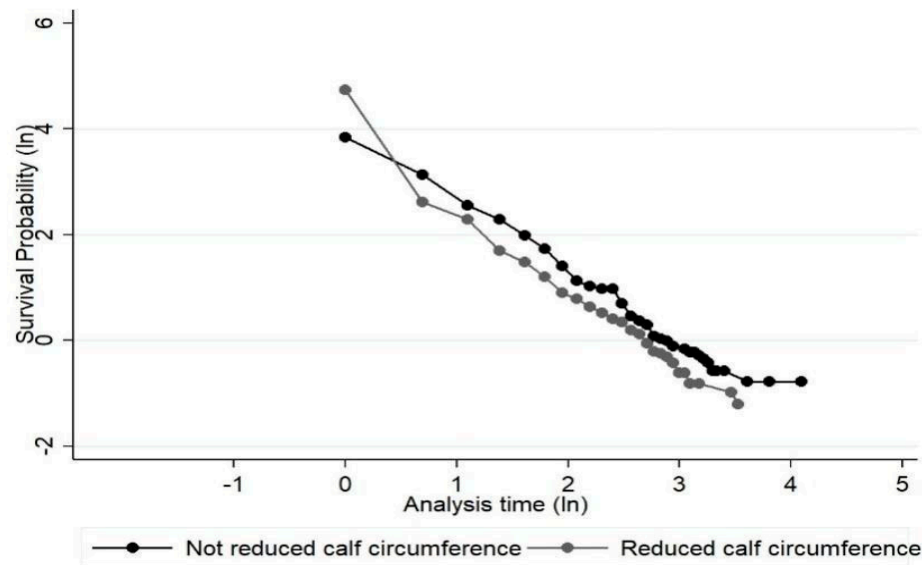

**Figure 2.** Survival curve of patients admitted at ICU with COVID-19 by calf circumference classification. Crude cox model.

**Table 4.** Survival model stratified by CCin patients admitted at ICU with COVID-19.

| Variables             | Model 1           |       | Model 2           |       |
|-----------------------|-------------------|-------|-------------------|-------|
|                       | OR (95% CI)       | p     | OR (95% CI)       | p     |
| CC (reducedvs normal) | 0.99 (0.55; 1.78) | 0.991 | 1.11 (0.52; 2.37) | 0.777 |

Crude cox model. Adjusted model by sex, age and APACHE II. \*Significant p value (<0.05).
